# Supplementary material for: Inhibition of Cdc42 during mitotic exit is required for cytokinesis
Source: PubMed Central journal article supplement — J Cell Biol. 2013 Jul 22;202(2):231–40. doi: 10.1083/jcb.201301090 (PMC3718968; doi:10.1083/jcb.201301090), 2013-07-22
Supplement: supp_jcb.201301090_JCB_201301090_sm.pdf [file supp_jcb.201301090_JCB_201301090_sm.pdf]

Atkins et al., <http://www.jcb.org/cgi/content/full/jcb.201301090/DC1>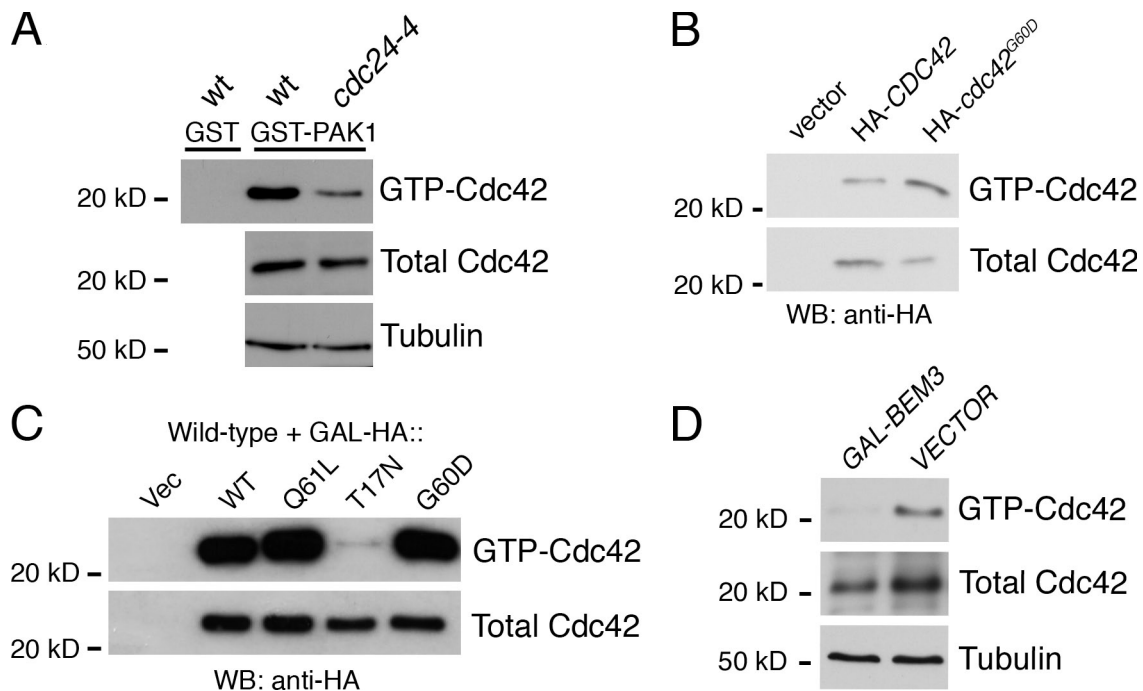

Figure S1. **Additional control experiments for CRIB pull-down assays.** (A) Similar ability of GST-PAK1-CRIB to detect active Cdc42 as for GST-Ste20-CRIB (Fig. 1). Wild-type (wt) and *cdc24-4* cells were grown to early log phase, shifted to 37°C for 3 h, harvested, and subjected to the GST-CRIB pull-down assay using purified GST-PAK1-CRIB. (B) GST-Ste20-CRIB pulls down more *cdc42*<sup>G60D</sup> than wild-type Cdc42. Wild-type cells were transformed with the indicated plasmids, grown to early log phase, and subjected to the GST-CRIB pull-down assay. (C) GST-Ste20-CRIB binds to dominant-active, but not dominant-negative, versions of Cdc42. Cells were transformed with the indicated plasmids, grown to early log phase, and subjected to the GST-CRIB pull-down assay. (D) Bem3 overexpression reduces global Cdc42 activity. Cells were transformed with the indicated plasmid, grown to early log phase, shifted to media containing galactose for 3 h, and subjected to the GST-CRIB pull-down assay. Vec, vector; WB, Western blot.

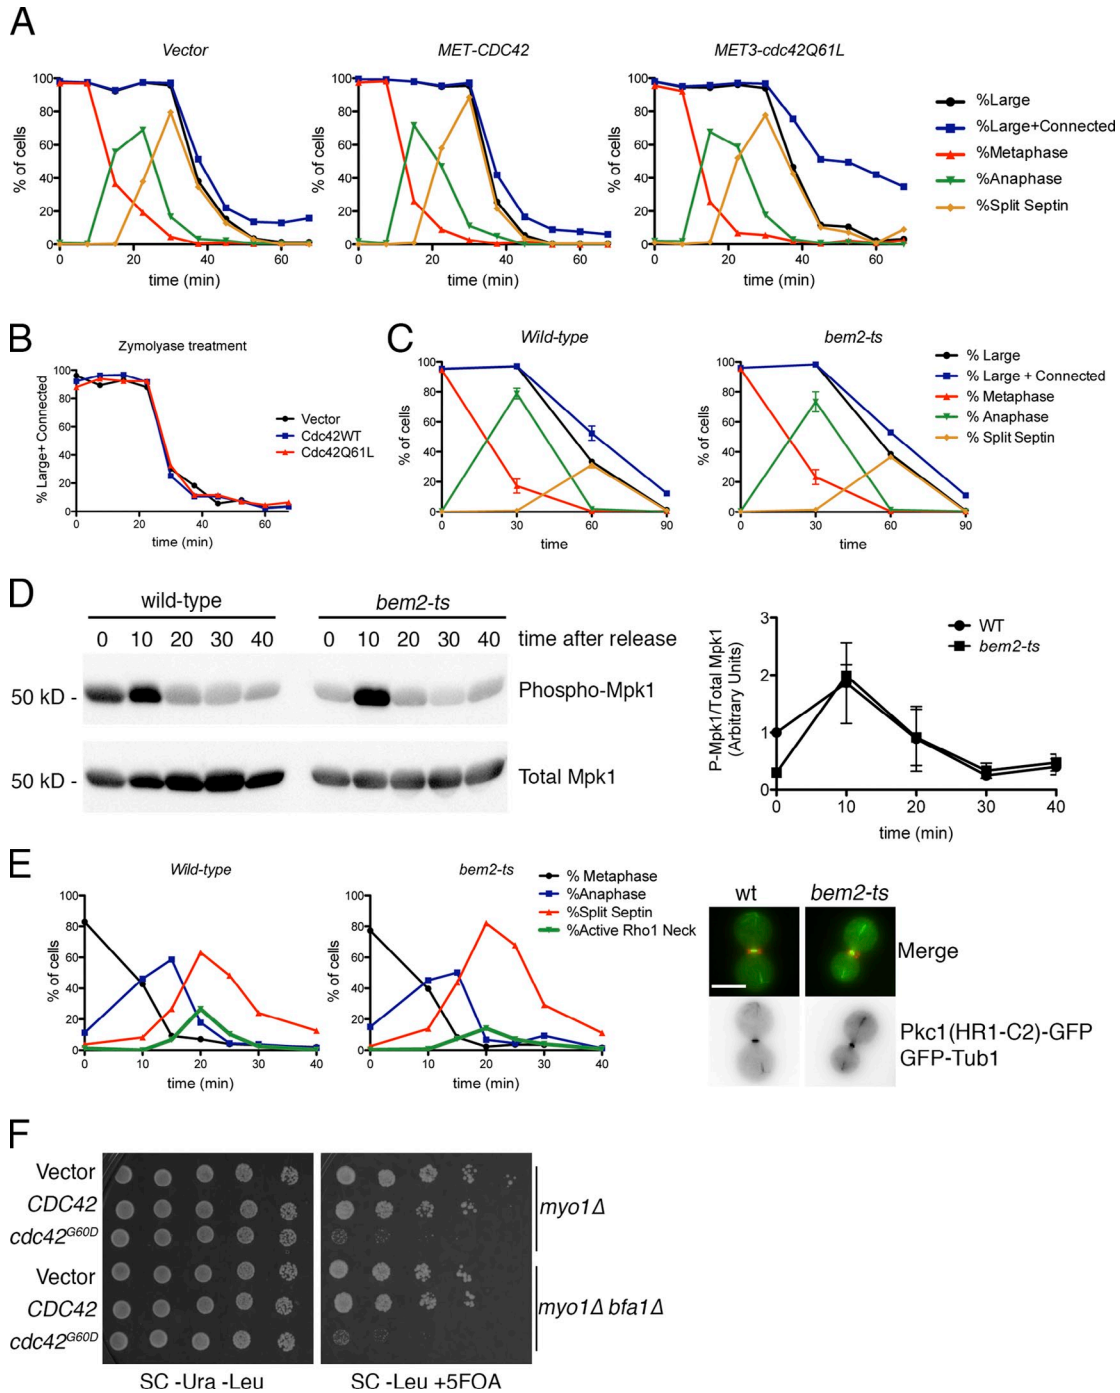

Figure S2. **Cdc42 activation during mitosis causes a cell separation defect.** (A) Expression of GTP-locked Cdc42 at metaphase causes a cell separation defect. *GALL-CDC20 GFP-TUB1 SHS1-GFP* cells were transformed with the indicated plasmids, arrested in metaphase for  $\sim 3$  h by depletion of Cdc20, shifted to media lacking methionine for 1 h to express Cdc42 or the indicated variants, and then released into the cell cycle by addition of galactose. Cells were sampled at the indicated time points, fixed, and scored by fluorescence microscopy. The percentage of cells displaying the indicated bud, spindle, or septin morphology is plotted. Percent large indicates the percentage of cells that were large budded. (B) Cells expressing GTP-locked Cdc42 have a cell separation defect. Samples from an experiment in A were treated with zymolyase. The percentage of cells that were large budded or connected was scored at each time point. (C) *bem2-ts* cells undergo normal cell separation at the permissive temperature. Cells were arrested in metaphase for  $\sim 3$  h by depletion of Cdc20 and then released into the cell cycle at 25°C and processed and scored as in Fig. 3 E. (D) Mpk1 phosphorylation is unaffected in synchronized *bem2-ts* cells. Cells were synchronized as in Fig. 3 E, and samples taken from the indicated time points (minutes) were processed for Western blotting. Graph shows means  $\pm$  SEM from two independent experiments. (E) The percentage of cells displaying bud neck localization of Pkc1(HR1-C2) is moderately reduced in *bem2-ts* cells. Cells expressing Pkc1(HR1-C2)-GFP were synchronized as in Fig. 3 E. Percent active Rho1 neck indicates the percentage of cells showing bud neck localization of Pkc1(HR1-C2)-GFP. The data are representative of two independent experiments. (right) Example *GFP-TUB1 SHS1-mCherry*  $\pm$  *bem2-ts* cells expressing Pkc1(HR1-C2)-GFP are shown. Bar, 5  $\mu$ m. (F) *BFA1* deletion (to hyperactivate mitotic exit network signaling) fails to suppress the sensitivity of *myo1* $\Delta$  cells to *cdc42*<sup>G60D</sup> expression. Results are representative of two independent transformants; cells were grown at 25°C for 3 d after fivefold serial dilution. The strains are complemented with a *MYO1 CEN URA3* plasmid that is counterselected by 5-fluoroarotic acid (5FOA). SC, synthetic complete; WT, wild type.

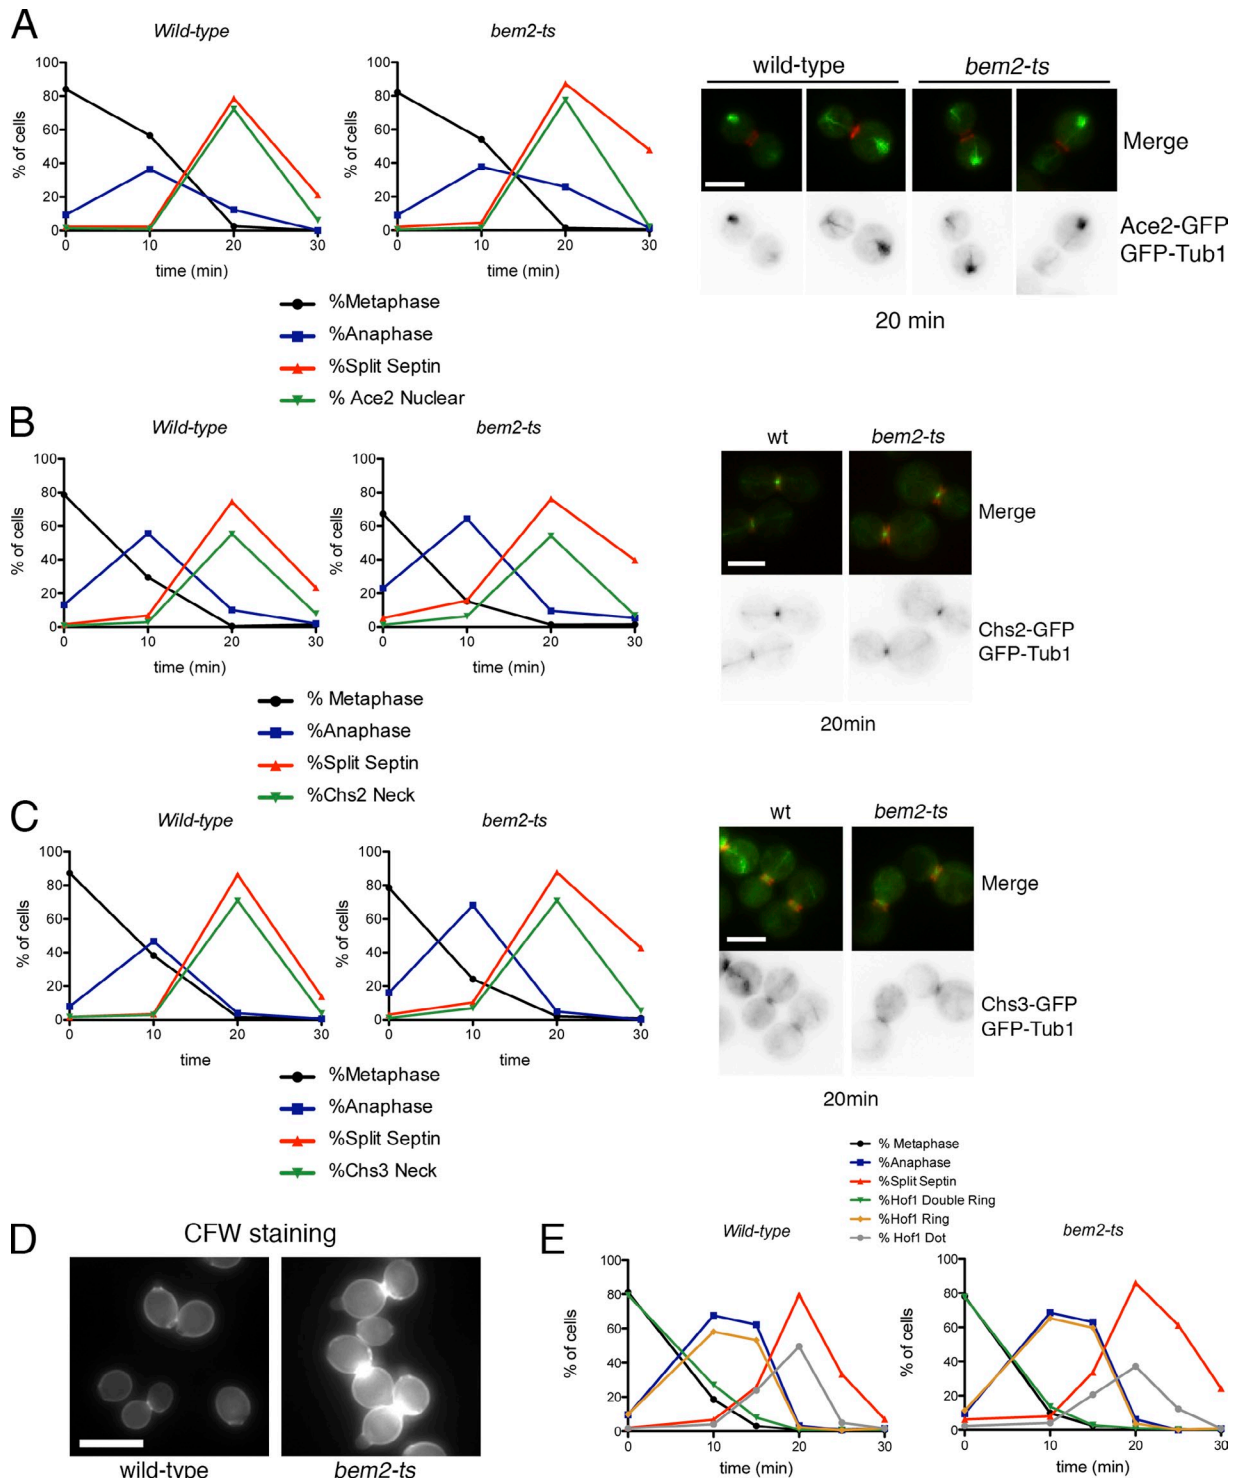

Figure S3. **Localization of cytokinesis and cell separation proteins in *bem2-ts* cells.** (A) Ace2-GFP localizes normally in *bem2-ts* cells undergoing mitotic exit. *MET3-CDC20 GFP-TUB1 SHS1-mCherry ACE2-GFP ± bem2-ts* cells were synchronized as in Fig. 3 E. Percent Ace2 nuclear indicates the percentage of cells displaying asymmetric nuclear localization of Ace2. (right) Montage of representative cells (a single focal plane is shown for clarity). Example is representative of two independent experiments. (B) Chs2-GFP localizes normally in *bem2-ts* cells undergoing mitotic exit. *MET3-CDC20 GFP-TUB1 SHS1-mCherry CHS2-GFP ± bem2-ts* cells were synchronized as in Fig. 3 E. Graph shows percentage of cells with the indicated spindle or septin morphology. Percent Chs2 neck indicates the percentage of cells showing Chs2-GFP localized to the bud neck. (right) Representative image of cells from 20 min after release (single focal plane for clarity). Example is representative of two independent experiments. (C) Chs3-GFP localizes normally in *bem2-ts* cells undergoing mitotic exit. *MET3-CDC20 GFP-TUB1 SHS1-mCherry CHS3-GFP ± bem2-ts* cells were synchronized as in Fig. 3 E. Graph shows percentage of cells with the indicated spindle or septin morphology. Percent Chs3 neck indicates the percentage of cells showing Chs3-GFP localized to the bud neck. (right) Single focal plane of representative cells 20 min after release. Example is representative of two independent experiments. (D) Abnormal chitin deposition at the bud neck in *bem2-ts* cells. Cells sampled 45 min after release from a *CDC20* arrest were stained with calcofluor white (CFW) to visualize chitin. (E) Hof1 localizes normally in *bem2-ts* cells undergoing mitotic exit. *MET3-CDC20 GFP-TUB1 SHS1-mCherry HOF1-GFP ± bem2-ts* cells were synchronized as in Fig. 3 E. Graph shows percentage of cells with the indicated spindle or septin morphology. Hof1 localization to the bud neck was scored as a double ring, a ring, a contracted dot, or absent. wt, wild type. Bars: (A–C) 5  $\mu$ m; (D) 10  $\mu$ m.

Table S1. Yeast strains used in this study

| Strain   | Relevant genotype                                                                                          | Source                        |
|----------|------------------------------------------------------------------------------------------------------------|-------------------------------|
| PY3295   | BY4741 <i>his3Δ1 leu2Δ0 met15Δ0 ura3Δ0 MATa</i>                                                            | Pellman permanent collections |
| PY7205   | YEF473a S288c <i>his3 leu2 trp1 ura3 MATa</i>                                                              | E. Bi <sup>a</sup>            |
| PY7206   | YEF473a S288c <i>his3 leu2 trp1 ura3 cdc24-4 MATa</i>                                                      | E. Bi                         |
| PY7207   | BY4741 <i>cln1::natMX cln2::hygR GAL1-CLN3-kanR MATa</i>                                                   | This study                    |
| PY3665   | BY4741 <i>bar1::kanR MATa</i>                                                                              | Pellman permanent collections |
| PY7208   | BY4741 <i>GALL-CDC20-kanR GFP-TUB1-URA3 MYO1-GFP-HIS3 MATa</i>                                             | This study                    |
| PY6573   | BY4741 <i>GALL-CDC20-kanR GFP-TUB1-URA3 SHS1-GFP-HIS3 MATa</i>                                             | This study                    |
| DLY13157 | YEF473a <i>BEM1-GFP-LEU2 Gic2(CRIB)-tdTomato-URA3 MATa/α</i>                                               | Howell et al., 2012           |
| PY7209   | <i>cdc5-2::URA3</i> 5x backcross to BY4741 <i>MATa</i>                                                     | Yoshida et al., 2006          |
| PY5220   | <i>cdc15-2</i> 5x backcross to BY4741 <i>MATa</i>                                                          | Yoshida et al., 2006          |
| PY6200   | BY4741 <i>cdc20-3::kanR MATa</i>                                                                           | C. Boone <sup>b</sup>         |
| SY1108   | BY4741 <i>Bem3(1-500)-13myc-HIS3 cdc15-2 MATa</i>                                                          | This study                    |
| SY940    | BY4741 <i>Bem3(1-500)-3HA-HIS3 cdc5-2::URA3 MATa</i>                                                       | This study                    |
| SY944    | BY4741 <i>Bem3(1-500)-3HA-HIS3 cdc15-2 MATa</i>                                                            | This study                    |
| SY938    | BY4741 <i>Bem3(1-500)-3HA MATa</i>                                                                         | This study                    |
| PY6545   | BY4741 <i>hof1::his3MX6 [HOF1 CEN URA3] MATa</i>                                                           | This study                    |
| PY5453   | BY4741 <i>myo1::his3MX6 [MYO1 CEN URA3] MATa</i>                                                           | This study                    |
| PY5032   | BY4741 <i>cyk3::kanR MATa</i>                                                                              | Pellman permanent collections |
| PY7210   | BY4741 <i>MET3-CDC20-TRP1 GFP-TUB1-LEU2 SHS1-mCherry-hygR MATa</i>                                         | This study                    |
| PY7211   | BY4741 <i>MET3-CDC20-TRP1 GFP-TUB1-LEU2 SHS1-mCherry-hygR bem2-ts(#84)-HIS3 MATa</i>                       | This study                    |
| PY7212   | BY4741 <i>MET3-CDC20-TRP1 GFP-TUB1-LEU2 SHS1-mCherry-hygR MYO1-GFP-kanR MATa</i>                           | This study                    |
| PY7213   | BY4741 <i>MET3-CDC20-TRP1 GFP-TUB1-LEU2 SHS1-mCherry-hygR MYO1-GFP-kanR bem2-ts(#84)-HIS3 MATa</i>         | This study                    |
| PY7214   | BY4741 <i>MET3-CDC20-TRP1 GFP-TUB1-LEU2 SHS1-mCherry-hygR IQG1-GFP-kanR MATa</i>                           | This study                    |
| PY7215   | BY4741 <i>MET3-CDC20-TRP1 GFP-TUB1-LEU2 SHS1-mCherry-hygR IQG1-GFP-kanR bem2-ts(#84)-HIS3 MATa</i>         | This study                    |
| PY7216   | BY4741 <i>MET3-CDC20-TRP1 GFP-TUB1-LEU2 SHS1-mCherry-hygR INN1-GFP-kanR MATa</i>                           | This study                    |
| PY7217   | BY4741 <i>MET3-CDC20-TRP1 GFP-TUB1-LEU2 SHS1-mCherry-hygR INN1-GFP-kanR bem2-ts(#84)-HIS3 MATa</i>         | This study                    |
| PY7218   | BY4741 <i>MET3-CDC20-TRP1 SHS1-mCherry-hygR IQG1-GFP-kanR MATa</i>                                         | This study                    |
| PY7219   | BY4741 <i>MET3-CDC20-TRP1 SHS1-mCherry-hygR IQG1-GFP-kanR bem2-ts(#84)-LEU2 MATa</i>                       | This study                    |
| PY7220   | BY4741 <i>MET3-CDC20-TRP1 SHS1-mCherry-hygR INN1-GFP-kanR MATa</i>                                         | This study                    |
| PY7221   | BY4741 <i>MET3-CDC20-TRP1 SHS1-mCherry-hygR INN1-GFP-kanR bem2-ts(#84)-LEU2 MATa</i>                       | This study                    |
| PY7222   | BY4741 <i>MET3-CDC20-TRP1 GFP-TUB1-LEU2 SHS1-mCherry-hygR ste20::kanR MATa</i>                             | This study                    |
| PY7223   | BY4741 <i>MET3-CDC20-TRP1 GFP-TUB1-LEU2 SHS1-mCherry-hygR bem2-ts(#84)-HIS3 ste20::kanR MATa</i>           | This study                    |
| PY7224   | BY4741 <i>MET3-CDC20-TRP1 GFP-TUB1-LEU2 SHS1-mCherry-hygR IQG1-kanR ste20::URA3 MATa</i>                   | This study                    |
| PY7225   | BY4741 <i>MET3-CDC20-TRP1 GFP-TUB1-LEU2 SHS1-mCherry-hygR IQG1-kanR bem2-ts(#84)-HIS3 ste20::URA3 MATa</i> | This study                    |
| PY7226   | BY4741 <i>MET3-CDC20-TRP1 GFP-TUB1-LEU2 SHS1-mCherry-hygR CHS2-GFP-kanR MATa</i>                           | This study                    |
| PY7227   | BY4741 <i>MET3-CDC20-TRP1 GFP-TUB1-LEU2 SHS1-mCherry-hygR CHS2-GFP-kanR bem2-ts(#84)-HIS3 MATa</i>         | This study                    |
| PY7228   | BY4741 <i>MET3-CDC20-TRP1 GFP-TUB1-LEU2 SHS1-mCherry-hygR CHS3-GFP-kanR MATa</i>                           | This study                    |
| PY7229   | BY4741 <i>MET3-CDC20-TRP1 GFP-TUB1-LEU2 SHS1-mCherry-hygR CHS3-GFP-kanR bem2-ts(#84)-HIS3 MATa</i>         | This study                    |
| PY7230   | BY4741 <i>MET3-CDC20-TRP1 GFP-TUB1-LEU2 SHS1-mCherry-hygR ACE2-GFP-kanR MATa</i>                           | This study                    |
| PY7231   | BY4741 <i>MET3-CDC20-TRP1 GFP-TUB1-LEU2 SHS1-mCherry-hygR ACE2-GFP-kanR bem2-ts(#84)-HIS3 MATa</i>         | This study                    |

<sup>a</sup>University of Pennsylvania, Philadelphia, PA.<sup>b</sup>University of Toronto, Toronto, Ontario, Canada.

Table S2. Plasmids used in this study

| Plasmid      | Relevant features                                   | Source                                             |
|--------------|-----------------------------------------------------|----------------------------------------------------|
| PB70         | pRS316 URA3 CEN AmpR                                | Pellman perms                                      |
| PB72         | pRS415 LEU2 CEN AmpR                                | Pellman perms                                      |
| PB158        | 2 $\mu$ URA3                                        | Pellman perms                                      |
| PB3050       | pRS415 GAL1-HA-CDC42 LEU2 CEN AmpR                  | This study                                         |
| PB3051       | pRS415 GAL1-HA-CDC42 <sup>Q61L</sup> LEU2 CEN AmpR  | This study                                         |
| PB3052       | pRS415 GAL1-HA-CDC42 <sup>T17N</sup> LEU2 CEN AmpR  | This study                                         |
| PB3053       | pRS415 GAL1-HA-CDC42 <sup>G60D</sup> LEU2 CEN AmpR  | This study                                         |
| PB3054       | pRS415 HA-CDC42 LEU2 CEN AmpR                       | This study                                         |
| PB3055       | pRS415 HA-cdc42 <sup>G60D</sup> AmpR                | This study                                         |
| PB1622       | pGEX-5X-1 GST AmpR                                  | Pellman perms                                      |
| PB3056       | pGEX-5X-1 GST-STE20(332–411) AmpR                   | This study                                         |
| PB3057       | pRS415 MET3-HA-CDC42 CEN LEU2 AmpR                  | This study                                         |
| PB3058       | pRS415 MET3-HA-CDC42 <sup>Q61L</sup> CEN LEU2 AmpR  | This study                                         |
| YEp351-CDC24 | CDC24 LEU2 2 $\mu$ AmpR                             | D. Johnson <sup>a</sup> ; Richman et al., 1999     |
| pAJ044       | IQG1 2 $\mu$ URA3                                   | J. Heinisch <sup>b</sup> ; Jendretzki et al., 2009 |
| PB2680       | GST-PAK1 AmpR                                       | Y. Zheng <sup>c</sup>                              |
| E735         | pRS316-HOF1 HOF1 CEN URA3 AmpR                      | E. Bi <sup>d</sup> ; Vallen et al., 2000           |
| E1361-1      | yIP211-GIC2-PBD-tdTomato-URA3 AmpR                  | E. Bi; Tong et al., 2007                           |
| pVD63        | PKC1(HR1-C2)-GFP URA3 CEN AmpR                      | M. Cyert <sup>e</sup> ; Denis and Cyert, 2005      |
| pMK187       | GALS-BEM3-GFP CEN URA3 AmpR                         | M. Peter <sup>f</sup> ; Knaus et al., 2007         |
| PB3063       | pRS316 MYO1 CEN URA3 AmpR                           | This study                                         |
| PB3064       | pMET3-CDC20-TRP1 AmpR                               | F. Uhlmann <sup>g</sup> ; Uhlmann et al., 2000     |
| PB3065       | pDLB3138 <i>bem2-ts(#84)::LEU2</i> integrative AmpR | This study                                         |
| PB3066       | <i>bem2-ts(#84)::HIS3</i> integrative AmpR          | This study                                         |
| pEL45        | <i>ste20::URA3</i> integrative                      | M. Whiteway <sup>h</sup> ; Leberer et al., 1992    |

<sup>a</sup>University of Vermont, Burlington, VT.

<sup>b</sup>University of Osnabrück, Osnabrück, Germany.

<sup>c</sup>Cincinnati Children's Hospital, Cincinnati, OH.

<sup>d</sup>University of Pennsylvania, Philadelphia, PA.

<sup>e</sup>Stanford University, Stanford, CA.

<sup>f</sup>ETH Zurich, Zurich, Switzerland.

<sup>g</sup>London Research Institute, London, England, UK.

<sup>h</sup>Concordia University, Montreal, Quebec, Canada.

## References

- Denis, V., and M.S. Cyert. 2005. Molecular analysis reveals localization of *Saccharomyces cerevisiae* protein kinase C to sites of polarized growth and Pkc1p targeting to the nucleus and mitotic spindle. *Eukaryot. Cell.* 4:36–45. <http://dx.doi.org/10.1128/EC.4.1.36-45.2005>
- Howell, A.S., M. Jin, C.F. Wu, T.R. Zyla, T.C. Elston, and D.J. Lew. 2012. Negative feedback enhances robustness in the yeast polarity establishment circuit. *Cell.* 149:322–333. <http://dx.doi.org/10.1016/j.cell.2012.03.012>
- Jendretzki, A., I. Ciklic, R. Rodicio, H.P. Schmitz, and J.J. Heinisch. 2009. Cyk3 acts in actomyosin ring independent cytokinesis by recruiting Inn1 to the yeast bud neck. *Mol. Genet. Genomics.* 282:437–451. <http://dx.doi.org/10.1007/s00438-009-0476-0>
- Knaus, M., M.P. Pelli-Gulli, F. van Drogen, S. Springer, M. Jaquenoud, and M. Peter. 2007. Phosphorylation of Bem2p and Bem3p may contribute to local activation of Cdc42p at bud emergence. *EMBO J.* 26:4501–4513. <http://dx.doi.org/10.1038/sj.emboj.7601873>
- Leberer, E., D. Dignard, D. Harcus, D.Y. Thomas, and M. Whiteway. 1992. The protein kinase homologue Ste20p is required to link the yeast pheromone response G-protein beta gamma subunits to downstream signalling components. *EMBO J.* 11:4815–4824.
- Richman, T.J., M.M. Sawyer, and D.I. Johnson. 1999. The Cdc42p GTPase is involved in a G2/M morphogenetic checkpoint regulating the apical-isotropic switch and nuclear division in yeast. *J. Biol. Chem.* 274:16861–16870. <http://dx.doi.org/10.1074/jbc.274.24.16861>
- Tong, Z., X.D. Gao, A.S. Howell, I. Bose, D.J. Lew, and E. Bi. 2007. Adjacent positioning of cellular structures enabled by a Cdc42 GTPase-activating protein-mediated zone of inhibition. *J. Cell Biol.* 179:1375–1384. <http://dx.doi.org/10.1083/jcb.200705160>
- Uhlmann, F., D. Wernic, M.A. Poupart, E.V. Koonin, and K. Nasmyth. 2000. Cleavage of cohesin by the CD clan protease separin triggers anaphase in yeast. *Cell.* 103:375–386. [http://dx.doi.org/10.1016/S0092-8674\(00\)00130-6](http://dx.doi.org/10.1016/S0092-8674(00)00130-6)
- Vallen, E.A., J. Caviston, and E. Bi. 2000. Roles of Hof1p, Bni1p, Bnr1p, and myo1p in cytokinesis in *Saccharomyces cerevisiae*. *Mol. Biol. Cell.* 11:593–611.
- Yoshida, S., K. Kono, D.M. Lowery, S. Bartolini, M.B. Yaffe, Y. Ohya, and D. Pellman. 2006. Polo-like kinase Cdc5 controls the local activation of Rho1 to promote cytokinesis. *Science.* 313:108–111. <http://dx.doi.org/10.1126/science.1126747>
